# Supplementary material for: LMAN1 serves as a cargo receptor for thrombopoietin
Source: JCI journal article supplement (doi:10.1172/jci.insight.175704), 2024-11-05
Supplement: sd2 [file 2]

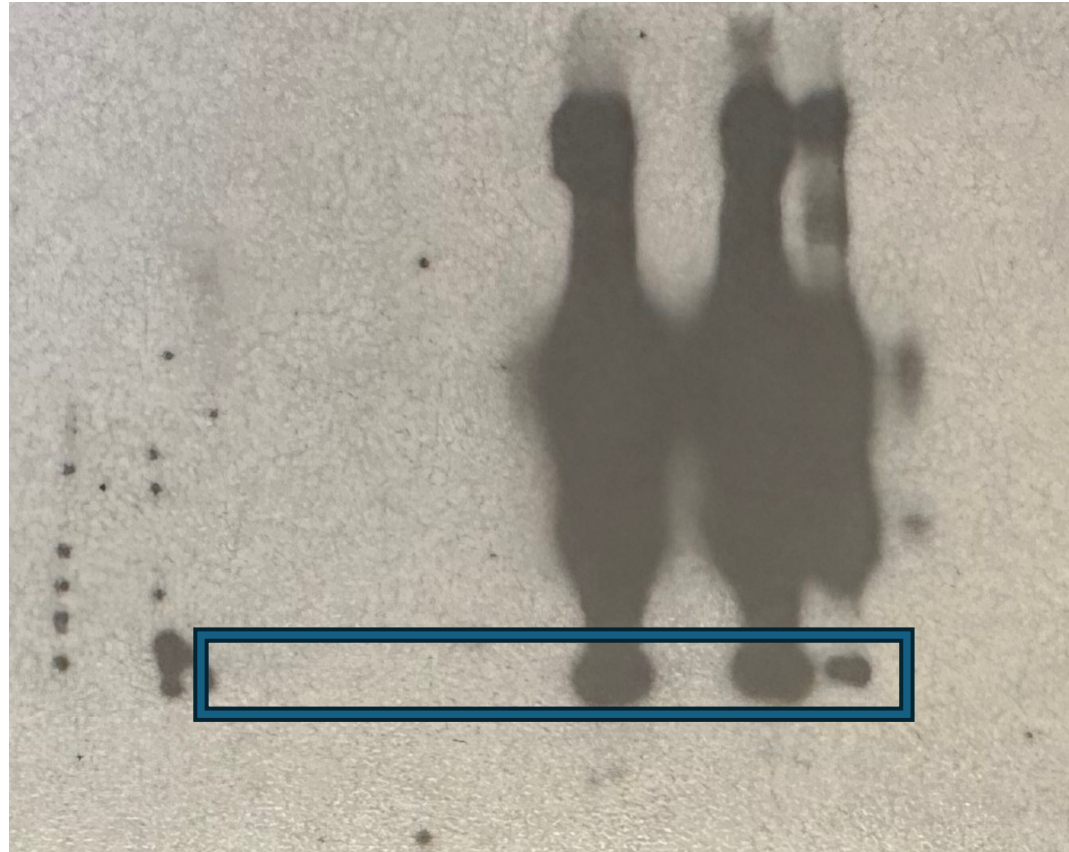

Entire gel for figure 5C

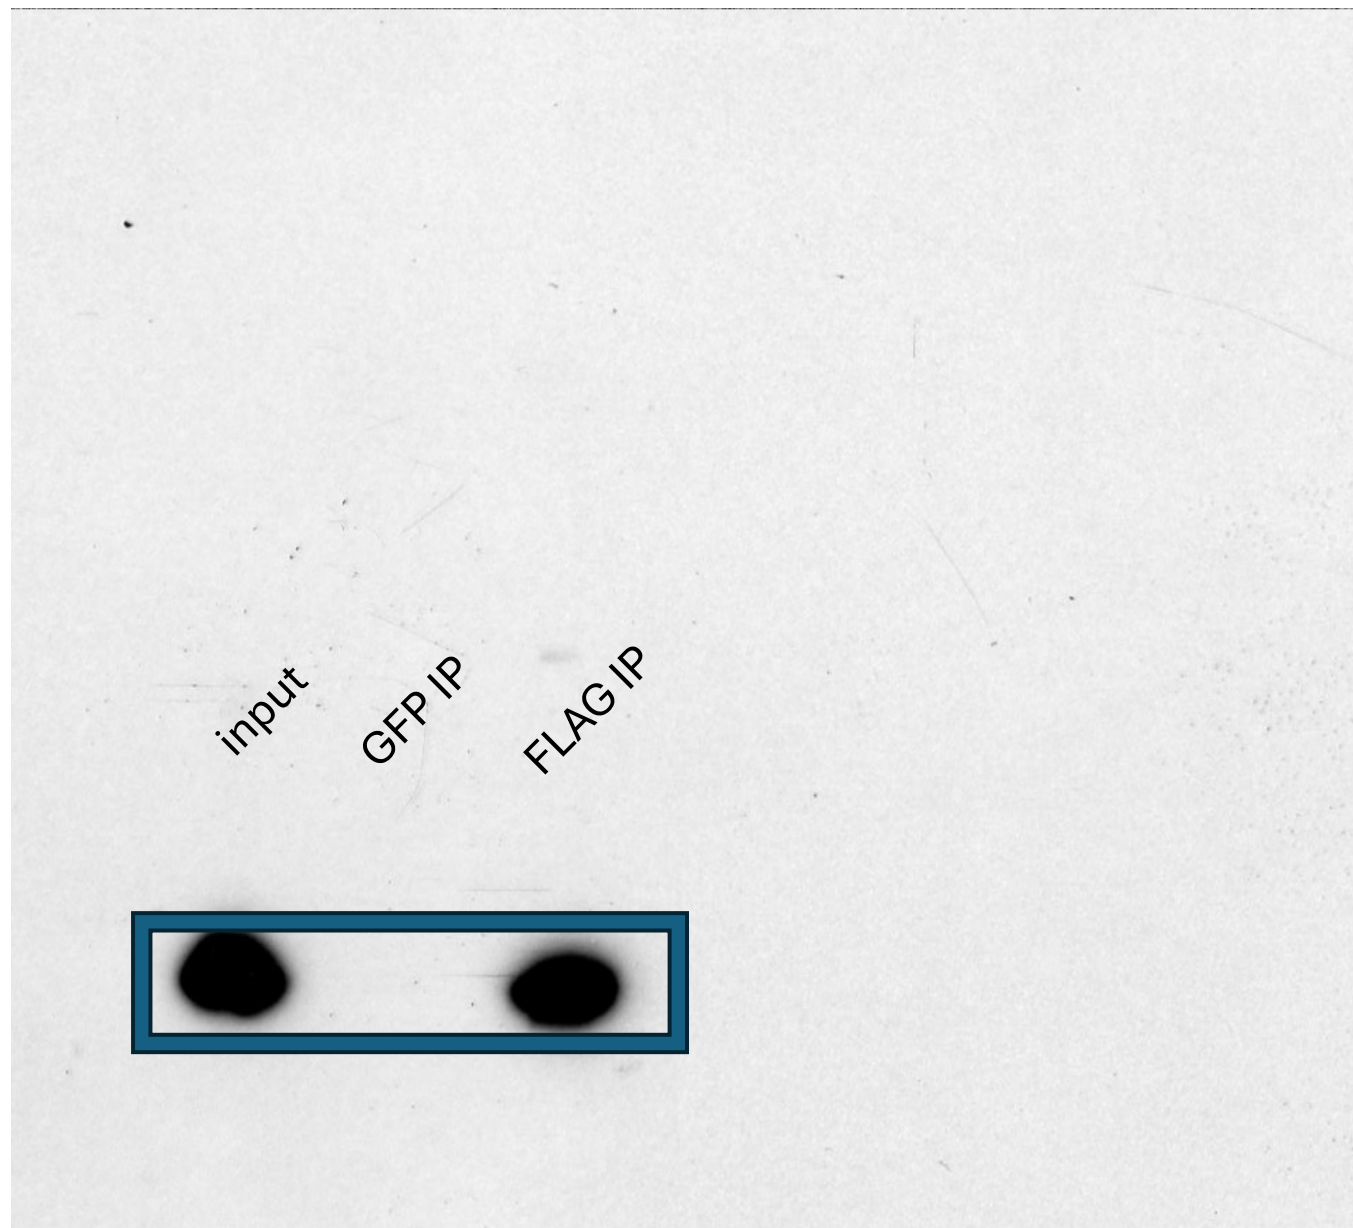

Anti-FLAG whole film for Figure S4

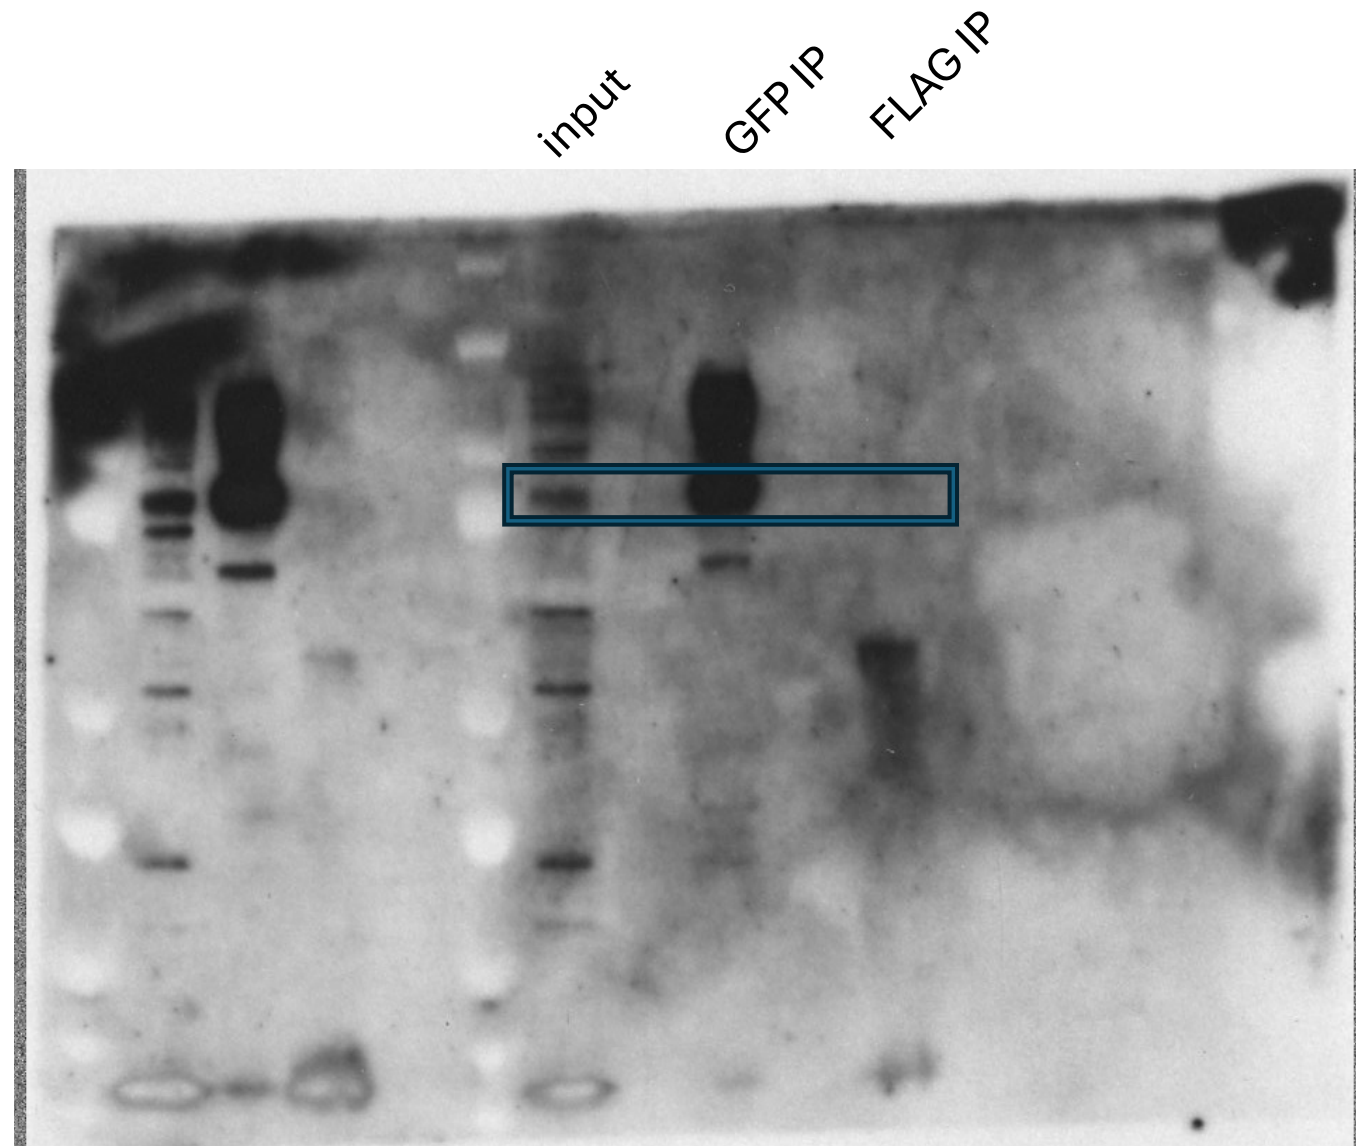

Anti-eGFP whole film for Figure S4
